# Supplementary material for: Renewable vanillin based flame retardant for poly(lactic acid): a way to enhance flame retardancy and toughness simultaneously
Source: Royal Society of Chemistry journal article supplement (doi:10.1039/c8ra08531e), 2018-01-01
Supplement: c8ra08531e1.pdf [file c8ra08531e1.pdf]

## Supporting Information

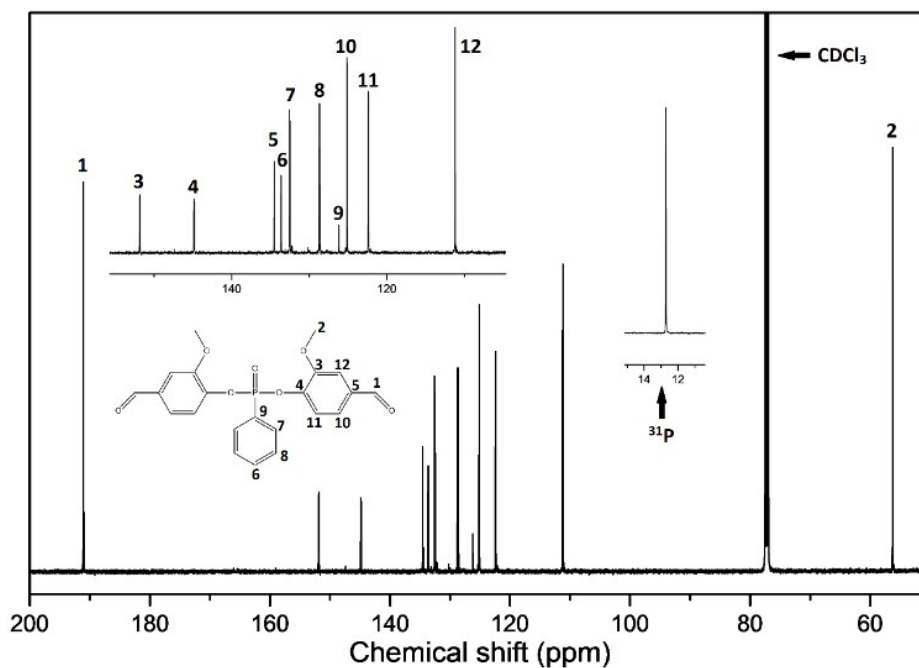

S 1:  $^{13}\text{C}$ - and  $^{31}\text{P}$  NMR spectra of VP

S 2: Data obtained from TGA plots of VA and VP

| Sample | $T_{5\%}$ ( $^{\circ}\text{C}$ ) | $T_{\text{max}}$ ( $^{\circ}\text{C}$ ) | Residue (wt-%) |
|--------|----------------------------------|-----------------------------------------|----------------|
| VA     | 124                              | 175                                     | 0              |
| VP     | 286                              | 343                                     | 24.5           |

$T_{x\%}$  was the temperature at x% weight loss of the samples.  $T_{\text{max}}$  was the temperature at the maximal rate of weight loss. Residue was the yield at 500  $^{\circ}\text{C}$ .

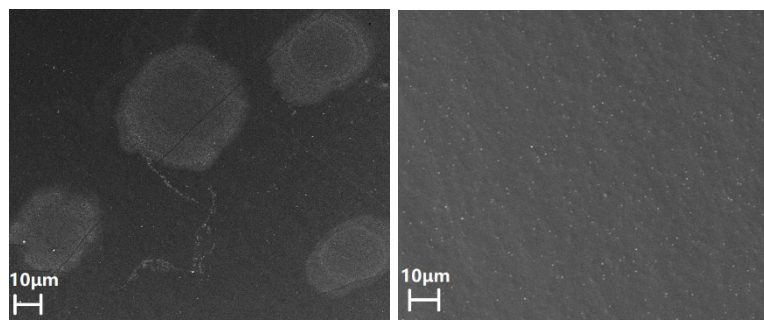

S 3: SEM pictures of PLA/VA (left) and PLA/VP (right) composites

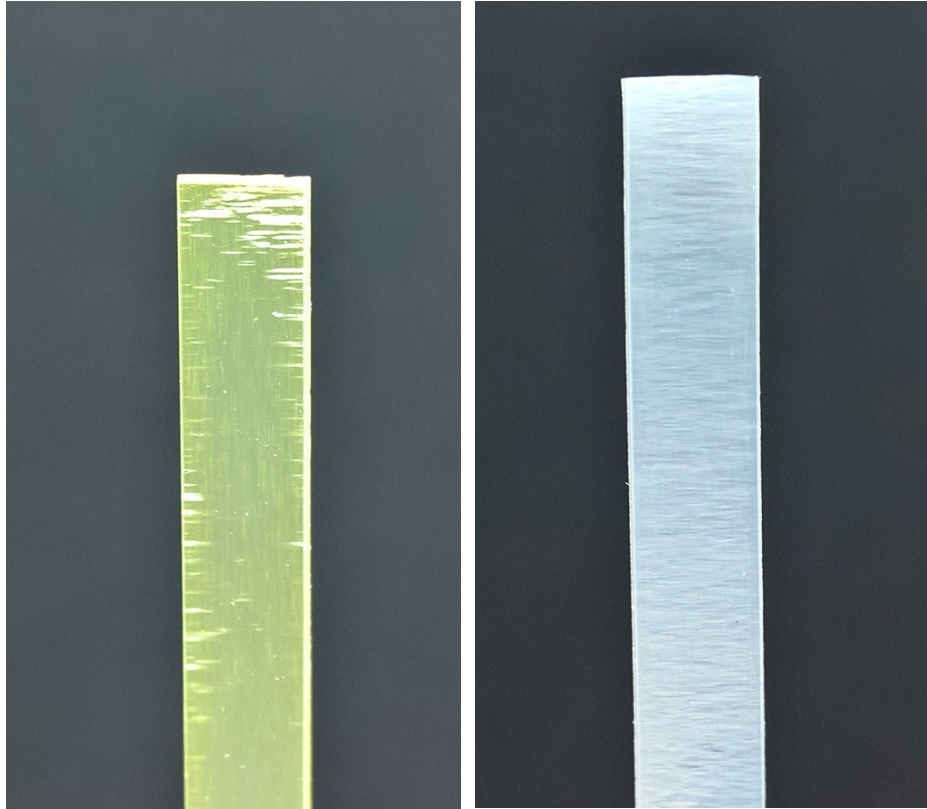

**S 4: Pictures of tensile bar after tests of PLA/VA (left) and PLA/VP (right) composites**
